# Supplementary material for: The Intention and Influence Factors of Nurses’ Participation in Telenursing
Source: MDPI journal article supplement (doi:10.3390/informatics8020035), 2021-05-18
Supplement: s1 [file s1]

Archive with 1 entries (1 files):
- informatics-1209947-supplementary.pdf
