# Supplementary material for: The Intention and Influence Factors of Nurses’ Participation in Telenursing
Source: MDPI journal article supplement (doi:10.3390/informatics8020035), 2021-05-18
Supplement: s1 [file s1 › informatics-1209947-supplementary.pdf]

## Supplementary Material

**Table S1.** The questionnaire in this study.

### Part One: The attitude towards telehealth nursing

Please answer the following questions according to your personal opinion towardstelehealth nursing, at this moment.

| Statement                                                                                                                                                                                                                                                  | Strongly Agree           | Agree                    | Neutral                  | Disagree                 | Strongly Disagree        |
|------------------------------------------------------------------------------------------------------------------------------------------------------------------------------------------------------------------------------------------------------------|--------------------------|--------------------------|--------------------------|--------------------------|--------------------------|
| 1. I think that telehealth communication system is able to provide medical personnel with information interpretation function.                                                                                                                             | <input type="checkbox"/> |
| 2. I think the ability of telehealth communication system to provide accurate information is very important in telenursing.                                                                                                                                | <input type="checkbox"/> |
| 3. I think the ability of telehealth communication system to instant messages is very important in telenursing.                                                                                                                                            | <input type="checkbox"/> |
| 4. I think the ability of telehealth communication system to fire instant alerts as soon as it receives abnormal physiological measurements, including blood pressure, heart rate, blood glucose and blood oxygen values is very important in telenursing. | <input type="checkbox"/> |
| 5. I think that telehealth communication system is able to increase work efficiency.                                                                                                                                                                       | <input type="checkbox"/> |
| 6. I think that nurses involving in telenursing must be familiar with the use of telehealth communication system.                                                                                                                                          | <input type="checkbox"/> |
| 7. I think that an easy-to-learn and easy-to-use telehealth communication system is very important for telenursing.                                                                                                                                        | <input type="checkbox"/> |
| 8. I think that telenursing would assist people with disabilities, older adults and patient with chronic diseases.                                                                                                                                         | <input type="checkbox"/> |
| 9. I think that telenursing can help the person being served to carry out self-care in their home or the living environment they are familiar with.                                                                                                        | <input type="checkbox"/> |
| 10. I think that telenursing can help the person being served with the ability to self-manage and consequently in controlling health issues (e.g. blood pressure, blood glucose etc).                                                                      | <input type="checkbox"/> |
| 11. I think that telenursing can help the person being served to develop good personal health management habits.                                                                                                                                           | <input type="checkbox"/> |
| 12. I think that telenursing can help caregivers to improve care skills.                                                                                                                                                                                   | <input type="checkbox"/> |
| 13. I think that telenursing can help the person being served to reduce the frequency of hospital visits.                                                                                                                                                  | <input type="checkbox"/> |
| 14. I think that telenursing can help the person being served to save time in hospital-consultation.                                                                                                                                                       | <input type="checkbox"/> |
| 15. I think telenursing can help reduce national health insurance expenditure.                                                                                                                                                                             | <input type="checkbox"/> |
| 16. I think that nurses play very important roles in telenursing.                                                                                                                                                                                          | <input type="checkbox"/> |
| 17. I think that professional competence is very important for telehealth nurses.                                                                                                                                                                          | <input type="checkbox"/> |
| 18. I think that nurses participating in telehealth must have excellent communication skill.                                                                                                                                                               | <input type="checkbox"/> |
| 19. I think that nurses participating in telehealth must have ability to provide care and consultation for chronic diseases.                                                                                                                               | <input type="checkbox"/> |

## Part Two: Subjective norm (social influence factors)

Which social factors will influence your willingness to participate in telenursing? Please answer the following questions according your personal situation.

|    | Statement                                                                                                                             | Strongly Agree           | Agree                    | Neutral                  | Disagree                 | Strongly Disagree        |
|----|---------------------------------------------------------------------------------------------------------------------------------------|--------------------------|--------------------------|--------------------------|--------------------------|--------------------------|
| 1. | Being supported by supervisors will enhance my willingness to participate in telenursing                                              | <input type="checkbox"/> |
| 2. | An understanding that telenursing is the future trend of healthcare policy will enhance my willingness to participate in telenursing. | <input type="checkbox"/> |
| 3. | Knowing that relatives and friends has used telehealth care will enhance my willingness to participate in telenursing.                | <input type="checkbox"/> |
| 4. | Knowing that colleagues or classmates has engaged in telenursing will enhance my willingness to participate in telenursing.           | <input type="checkbox"/> |

## Part Three: Perceived Behavior Control (all external resources and self-efficacy)

Please select the most suitable situation.

|    | Statement                                                                                                                                        | Strongly Agree           | Agree                    | Neutral                  | Disagree                 | Strongly Disagree        |
|----|--------------------------------------------------------------------------------------------------------------------------------------------------|--------------------------|--------------------------|--------------------------|--------------------------|--------------------------|
| 1. | I am a nurse with professional nursing skills.                                                                                                   | <input type="checkbox"/> |
| 2. | I have a positive attitude and the ability to inspire chronic patients.                                                                          | <input type="checkbox"/> |
| 3. | I am able to use the information system of the current work unit to complete my work smoothly.                                                   | <input type="checkbox"/> |
| 4. | I am able to search the information I need from the internet.                                                                                    | <input type="checkbox"/> |
| 5. | I am able to learn new computer skills when demonstration and explanation are provided by instructors.                                           | <input type="checkbox"/> |
| 6. | <del>I almost have no ideas about telenursing.</del>                                                                                             | <input type="checkbox"/> |
| 7. | My work institute/unit has held telenursing related on-the-job education courses                                                                 | <input type="checkbox"/> |
| 8. | Relevant knowledge and on-the-job training on telenursing provided by work institute will enhance my willingness to participate in telenursing.  | <input type="checkbox"/> |
| 9. | Being able to receive a quick response from the IT unit when I provide user feedback, will enhance my willingness to participate in telenursing. | <input type="checkbox"/> |

## Part Four: Behavioral Intention

Please answer the following questions according to your personal willingness to work as a telehealth nurse.

|    | Statement                                                                                                                                                             | Strongly Agree           | Agree                    | Neutral                  | Disagree                 | Strongly Disagree        |
|----|-----------------------------------------------------------------------------------------------------------------------------------------------------------------------|--------------------------|--------------------------|--------------------------|--------------------------|--------------------------|
| 1. | I am willing to spend time learning about telehealth related knowledge.                                                                                               | <input type="checkbox"/> |
| 2. | I am willing to involve in telehealth nursing services.                                                                                                               | <input type="checkbox"/> |
| 3. | I am willing to improve my nursing profession taking advantage of all kinds of opportunities to meet the demand of telehealth nursing staff.                          | <input type="checkbox"/> |
| 4. | I am willing to take advantage of all kinds of opportunities to learn about how to use telehealth system and knowledge to meet the demand of telehealth nursing staff | <input type="checkbox"/> |
| 5. | I will actively attend on-the-job training courses on telehealth.                                                                                                     | <input type="checkbox"/> |
| 6. | I have attended on-the-job training courses or conference held internally in the hospital.                                                                            | <input type="checkbox"/> |
| 7. | I have attended on-the-job training courses or conference held externally.                                                                                            | <input type="checkbox"/> |

**Table S2.** Summary of a traditional relative weight.

| Predictor                           | B       | $\beta$ | VIF   | RW       | CI-L   | CI-U   | RS-RW (%) |
|-------------------------------------|---------|---------|-------|----------|--------|--------|-----------|
| <b>Criterion=Behavior intention</b> |         |         |       |          |        |        |           |
| [R <sup>2</sup> = 0.3046]           |         |         |       |          |        |        |           |
| Constant                            | 6.262   |         |       |          |        |        |           |
| Perceived usefulness                | 0.117   | 0.130   | 3.283 | 0.031    | -0.003 | 0.065  | 10.31     |
| Perceived ease of use               | -0.095  | -0.062  | 2.637 | 0.013    | -0.027 | 0.031  | 4.39      |
| Compatibility                       | -0.006  | -0.003  | 1.913 | 0.018    | -0.019 | 0.049  | 5.90      |
| Supervisor influence                | 0.548   | 0.153   | 2.841 | 0.046    | -0.003 | 0.093  | 15.22     |
| Peer influence                      | 0.135   | 0.039   | 2.358 | 0.039    | -0.002 | 0.083  | 12.72     |
| Self-efficacy                       | 0.032   | 0.018   | 1.697 | 0.021    | -0.020 | 0.057  | 7.02      |
| Facilitating conditions             | 0.864*  | 0.369   | 1.551 | 0.135 *  | 0.044  | 0.281  | 44.45     |
| <b>Criterion=Behavior intention</b> |         |         |       |          |        |        |           |
| [R <sup>2</sup> = 0.2515]           |         |         |       |          |        |        |           |
| Constant                            | 4.967   |         |       |          |        |        |           |
| Attitude                            | 0.007   | 0.013   | 2.026 | 0.0503 * | 0.0173 | 0.1175 | 19.98     |
| Subjective norms                    | 0.437 * | 0.231   | 2.057 | 0.0838 * | 0.0304 | 0.1630 | 33.34     |
| Perceptual behavior control         | 0.378 * | 0.311   | 1.870 | 0.1174 * | 0.0485 | 0.2131 | 46.68     |

B, unstandardized coefficient of regression;  $\beta$ , standardized coefficient of regression; VIF, variance inflation factors; RW, raw relative weight; CI-L, lower bound of 95% confidence interval used to test the statistical significance of raw relative weight; CI-U, upper bound of 95% confidence interval used to test the statistical significance of raw relative weight; RS-RW, relative weight rescaled as a percentage of predicted variable in the criterion of behavior intention attributed to each indicator. \*  $p$  value < 0.05
